# Supplementary material for: A clinical survey of mosaic single nucleotide variants in disease-causing genes detected by exome sequencing
Source: Genome Med. 2019 Jul 26;11:48. doi: 10.1186/s13073-019-0658-2 (PMC6660700; doi:10.1186/s13073-019-0658-2)
Supplement: Supplementary file 4 — The list of HPO terms of 80 proband phenotypes. (XLSX 16 kb) [file 13073_2019_658_MOESM4_ESM.xlsx]

## Sheet: data_cao_ye_mosaic_HPO
ID in the manuscript	Gene	Mutation	Ids_hpo
37F	ACTA1	c.1003C>T (p.P335S)	HP:0001508,HP:0001263,HP:0001252
49M	ADGRV1	c.16368G>T (p.K5456N)	HP:0200134,HP:0002126,HP:0001508,HP:0001252,HP:0001250,HP:0001249,HP:0000750,HP:0000505,HP:0000486
57F	ALG13	c.320A>G (p.N107S)	HP:0001290,HP:0001270,HP:0001250,HP:0000750
50M	ALG6	c.52C>T (p.R18*)	HP:0030680,HP:0008751,HP:0008046,HP:0007420,HP:0004322,HP:0003121,HP:0002779,HP:0002757,HP:0002749,HP:0002650,HP:0002616,HP:0002089,HP:0002019,HP:0001999,HP:0001892,HP:0001627,HP:0001508,HP:0001382,HP:0001371,HP:0001270,HP:0001263,HP:0001252,HP:0001249,HP:0001187,HP:0001166,HP:0001075,HP:0000939,HP:0000924,HP:0000924,HP:0000776,HP:0000750,HP:0000572,HP:0000501,HP:0000478,HP:0000238
1F	ARID1A	c.2914delG (p.D972fs)	HP:0009237,HP:0008386,HP:0007687,HP:0002020,HP:0002015,HP:0001999,HP:0001684,HP:0001601,HP:0001270,HP:0001249,HP:0000750,HP:0000256
2M	ARID2	c.4741C>T (p.P1581S)	HP:0002744,HP:0002086,HP:0002011,HP:0001696,HP:0001396,HP:0001249,HP:0000202
3M	ASXL1	c.2083_2084delCA (p.Q695fs)	HP:0009592, HP:0002863, HP:0002063, HP:0001999, HP:0003764, HP:0000421, HP:0040171
40U	BRAF	c.1786G>C (p.G596R)	HP:0001744
67M	CASK	c.913_914dupAA (p.G306fs)	HP:0001263, HP:0000252
58F	CDKL5	c.593G>A (p.G198D)	HP:0002376,HP:0001276,HP:0001270,HP:0001250,HP:0001249,HP:0000750
68M	CLIC2	c.255A>T(p.K85N)	HP:0002020,HP:0001655,HP:0001622,HP:0001511,HP:0001510,HP:0000062,HP:0000047,HP:0000028,HP:0000023
4M	COL12A1	c.533G>T (p.R178I)	HP:0100021,HP:0012443,HP:0007200,HP:0002376,HP:0001249,HP:0000717
38F	COL6A3	c.3932A>T(p.N1311I)	HP:0012683,HP:0004324,HP:0004313,HP:0002376,HP:0002240,HP:0001943,HP:0001290,HP:0001263,HP:0001250,HP:0000100,HP:0000097
51F	COX15	c.1129A>T (p.K377*)	HP:0001263, HP:0002376,HP:0000252, HP:0001339, HP:0006989, HP:0000609
6M	CREBBP	c.1447C>T (p.R483*)	HP:0009743,HP:0004691,HP:0001999,HP:0001513,HP:0001382,HP:0001270,HP:0001249,HP:0000750,HP:0000564,HP:0000365,HP:0000252
5F	CREBBP	c.5991delC (p.V1998fs)	HP:0030680,HP:0001999,HP:0001508,HP:0001270,HP:0000750,HP:0000478,HP:0000252
52F	CWF19L1	c.70delA (p.R24fs)	HP:0003739,HP:0002376,HP:0001276,HP:0001272,HP:0001250,HP:0001249,HP:0000639,HP:0000587,HP:0000543,HP:0000098
60F	DDX3X	c.1805G>A (p.R602Q)	HP:0001288,HP:0001263,HP:0001252,HP:0000750,HP:0000729
59F	DDX3X	c.573_575del (p.I191del)	HP:0100021,HP:0011100,HP:0008619,HP:0002744,HP:0002079,HP:0001999,HP:0001257,HP:0001252,HP:0001249,HP:0000365,HP:0000202
69M	DMD	c.583C>T (p.R195*)	HP:0100022,HP:0012443,HP:0011098,HP:0002721,HP:0002719,HP:0002075,HP:0001310,HP:0001249,HP:0000365
7M	DNM1	c.415G>C (p.G139R)	HP:0100022,HP:0001999,HP:0001548,HP:0001513,HP:0001270,HP:0001252,HP:0001250,HP:0001249,HP:0000750,HP:0000717,HP:0000256
8M	DNMT3A	c.2260C>T(p.L754F)	HP:0002579,HP:0025160,HP:0012446,HP:0012168,HP:0010536,HP:0004322,HP:0002720,HP:0002719,HP:0001298,HP:0001290,HP:0001284,HP:0001250,HP:0000718,HP:0000717,HP:0000708
9M	DYNC1H1	c.5497G>A (p.A1833T)	HP:0011097,HP:0007018,HP:0001337,HP:0001263,HP:0001252,HP:0000252
10M	EEF1A2	c.796C>T(p.R266W)	HP:0100021,HP:0012443,HP:0011097,HP:0001270,HP:0001266
11F	ELN	c.1711G>A (p.A571T)	HP:0002020,HP:0002015,HP:0001999,HP:0001627,HP:0000750,HP:0000750,HP:0000365,HP:0000201
12U	ENG	c.67+2T>G	HP:0010557,HP:0002119,HP:0001636,HP:0001511,HP:0000202,HP:0000175
13F	EP300	c.2660C>T(p.T887I)	HP:0001508, HP:0002205, HP:0200136, HP:0001626, HP:0001263 , HP:0000775, HP:0001999
14F	GABRB2	c.664G>T (p.V222F)	HP:0000750, HP:0001662 , HP:0001250
15F	GJA1	c.433G>A(p.V145M)	HP:0002862,HP:0008070,HP:0001508,HP:0000494,HP:0000286,HP:0000126
53M	GNPTG	c.376G>A (p.G126S)	HP:0001249, HP:0002376
70M	GRIA3	c.1936T>C (p.S646P)	HP:0100021,HP:0100021,HP:0006970,HP:0002510,HP:0002011,HP:0001270,HP:0001250,HP:0001249
71M	GRIA3	c.1981A>G (p.M661V)	HP:0001371,HP:0001276,HP:0001270,HP:0001250,HP:0000023
61F	HCFC1	c.1004A>G (p.Y335C)	MONDO:0018859,HP:0012748,HP:0007183,HP:0005957,HP:0002015,HP:0001508,HP:0001290,HP:0001252,HP:0001250,HP:0000597,HP:0000508
16F	HNRNPK	c.1003G>A (p.G335S)	HP:0001382,HP:0001347,HP:0001270,HP:0001252,HP:0001249,HP:0000750,HP:0000337
43F	HRAS	c.38G>A (p.G13D)	HP:0011121,HP:0008070,HP:0007435,HP:0002299,HP:0001595,HP:0000962,HP:0000953
72M	HUWE1	c.8987G>A(p.R2996Q)	HP:0012378,HP:0007018,HP:0003115,HP:0002019,HP:0001382,HP:0001290,HP:0001270,HP:0001249,HP:0001166,HP:0000974,HP:0000767,HP:0000729,HP:0000708,HP:0000098
55M	IDH1	c.395G>A (p.R132H)	HP:0030038,HP:0030038,HP:0005701,HP:0003942
17M	IDH2	c.419G>A (p.R140Q)	HP:0100293,HP:0004322,HP:0003803,HP:0001508,HP:0001344,HP:0001276,HP:0001276,HP:0001270,HP:0001270,HP:0001250,HP:0001250,HP:0001141,HP:0000572,HP:0000252,HP:0000218,HP:0000218
18M	KANSL1	c.868C>T (p.R290*)	HP:0000479,HP:0030750,HP:0010609,HP:0006528,HP:0002779,HP:0002093,HP:0001643,HP:0001622,HP:0001511,HP:0000821,HP:0000528,HP:0000185,HP:0000062,HP:0000023
19M	KCNT1	c.1421G>A (p.R474H)	HP:0030680,HP:0002780,HP:0001270,HP:0001252,HP:0001250,HP:0000078
73M	KDM5C	c.469T>A (p.Y157N)	HP:0004322,HP:0002750,HP:0001382,HP:0001252,HP:0000750,HP:0000545
74M	KDM6A	c.2172_2173delAT(p.L725fs)	HP:0001250,HP:0000708
20F	KIF1B	c.2710G>A (p.E904K)	HP:0005306,HP:0004322,HP:0002518,HP:0002020,HP:0001999,HP:0001998,HP:0001631,HP:0001622,HP:0001511,HP:0001508,HP:0001270,HP:0001252,HP:0000975
21F	KMT2A	c.3581G>A (p.C1194Y)	HP:0100022,HP:0012443,HP:0006579,HP:0002813,HP:0001999,HP:0001344,HP:0001270,HP:0001252,HP:0001250,HP:0001249,HP:0000998,HP:0000252
22M	KMT2D	c.10938_10939delinsT (p.P3647fs)	HP:0002744,HP:0001627,HP:0001360,HP:0000202
23M	KMT2D	c.8506C>T (p.R2836C)	HP:0001263, HP:0000252, HP:0004322,HP:0006934, HP:0006830, HP:0000977, HP:0001999
41M	KRAS	c.355G>A (p.D119N)	HP:0004322, HP:0000252, HP:0001249, HP:0001263, HP:0002376,HP:0000718, HP:0025481, HP:0006970
75M	L1CAM	c.2357T>A(p.I786N)	HP:0002500,HP:0012712,HP:0030350,HP:0012762,HP:0012712,HP:0010863,HP:0010783,HP:0006956,HP:0002119,HP:0002079,HP:0001288,HP:0001276,HP:0001263,HP:0000388
46M	MTOR	c.5930C>T (p.T1977I)	HP:0002119,HP:0001999,HP:0001762,HP:0001643,HP:0001622,HP:0001548,HP:0000256,HP:0000122
45M	MTOR	c.7247C>A (p.A2416D)	HP:0012443,HP:0011968,HP:0001999,HP:0001263,HP:0001252,HP:0001100,HP:0001000,HP:0000256
44M	MTOR	c.7255G>A (p.E2419K)	HP:0012450,HP:0007206,HP:0003782,HP:0002719,HP:0002376,HP:0001999,HP:0001508,HP:0001433,HP:0001270,HP:0001252,HP:0001250,HP:0001249,HP:0000951,HP:0000750,HP:0000256,HP:0000098
62F	NAA10	c.247C>T (p.R83C)	HP:0007018,HP:0002015,HP:0001999,HP:0001270,HP:0001007,HP:0000962,HP:0000750
24F	NALCN	c.1783G>T (p.V595F)	HP:0100309,HP:0040064,HP:0001999,HP:0001511,HP:0001508,HP:0001382,HP:0001371,HP:0001270,HP:0001250,HP:0000750,HP:0000256
66M	NEXMIF	c.862G>T(p.E288*)	HP:0000750, HP:0001270, HP:0002376, HP:0002342, HP:0002121, HP:0001250 , HP:0001987, HP:0007018, HP:0007302, HP:0000717, HP:0001513, HP:0002829, HP:0003326
25M	NF1	c.5907_5908delAA (p.R1970fs)	HP:0001263, HP:0000470, HP:0003186, HP:0004322, HP:0001838, HP:0001181, HP:0000957, HP:0011330, HP:0007687, HP:0012443
26F	NF2	c.810+1G>T(N/A)	HP:0002788,HP:0000618,HP:0000505
27F	NLRC4	c.512C>T (p.S171F)	HP:0002904,HP:0002643,HP:0001903,HP:0001873,HP:0001790,HP:0001622,HP:0001541,HP:0001433,HP:0001396,HP:0000103
28M	NOTCH2	c.118A>G (p.M40V)	HP:0004322,HP:0001622,HP:0001508,HP:0001382,HP:0001276,HP:0001270,HP:0001252,HP:0001250,HP:0001249,HP:0000924,HP:0000572,HP:0000478,HP:0000252
63F	OPHN1	c.1817C>T (p.S606F)	HP:0002099,HP:0001999,HP:0001627,HP:0001270,HP:0000750,HP:0000365
76M	OTC	c.1048C>T (p.Q350*)	HP:0002376,HP:0002188,HP:0001320,HP:0001290,HP:0001270,HP:0001266,HP:0001257,HP:0001250,HP:0001249,HP:0000750,HP:0000252
77M	PCDH19	c.919G>A (p.E307K)	HP:0002011,HP:0001263,HP:0000750,HP:0000729
78M	PDHA1	c.265G>A (p.G89S)	HP:0009830,HP:0002650,HP:0001344,HP:0001304,HP:0001298,HP:0001263,HP:0000505,HP:0000252
47M	PIK3CA	c.1030G>A (p.V344M)	HP:0000750,HP:0000729,HP:0000329,HP:0000256,HP:0000126
48F	PIK3CA	c.1093G>A (p.E365K)	HP:0004691,HP:0001999,HP:0001561,HP:0001528,HP:0001513,HP:0001270,HP:0001249,HP:0000954,HP:0000750,HP:0000256,HP:0000238,HP:0000126
29F	PIK3CA	c.1359_1361delAGA(p.E453del)	HP:0008404,HP:0001999,HP:0001622,HP:0001528,HP:0001513,HP:0001270,HP:0000256
30M	POLG	c.2557C>T (p.R853W)	HP:0012817,HP:0001297
31F	PTPN11	c.1403C>T(p.T468M)	HP:0007370,HP:0001290,HP:0001263,HP:0001250,HP:0000252,HP:0000248
36F	ROBO1	c.3055T>G(p.Y1019D)	HP:0012304,HP:0010609,HP:0006349,HP:0004322,HP:0003225,HP:0002650,HP:0002013,HP:0001669,HP:0001371,HP:0001297,HP:0001270,HP:0001250,HP:0000822,HP:0000805,HP:0000750,HP:0000545,HP:0000483
39F	SLC25A4	c.706C>T (p.R236C)	HP:0002119,HP:0001250,HP:0000256
32M	SNTG1	c.814A>T (p.K272*)	HP:0011968,HP:0004322,HP:0002650,HP:0002566,HP:0001999,HP:0001744,HP:0001627,HP:0001622,HP:0001508,HP:0001371,HP:0001290,HP:0001276,HP:0001270,HP:0001249,HP:0000750,HP:0000572,HP:0000478,HP:0000252,HP:0000047,HP:0000028
64F	SNX14	c.1050T>A(p.F350L)	HP:0002516,HP:0002376,HP:0002208,HP:0001250
33F	SYNGAP1	c.1630C>T(p.R544*)	HP:0012443,HP:0012173,HP:0001999,HP:0001513,HP:0001320,HP:0001263,HP:0001252,HP:0001249,HP:0000821,HP:0000545
56M	TET2	c.3961A>T (p.K1321*)	HP:0003416,HP:0003141,HP:0100749,HP:0007002,HP:0002664,HP:0002578,HP:0001288
34M	TRAF7	c.1111C>G (p.R371G)	HP:0012443,HP:0007687,HP:0002376,HP:0001999,HP:0001511,HP:0001270,HP:0001250,HP:0001249,HP:0000750,HP:0000717,HP:0000508,HP:0000476
79M	TTN	c.87881T>C(p.V29294A)	HP:0025169,HP:0012669,HP:0001688,HP:0001622,HP:0001508
35M	TWIST2	c.223G>C(p.E75Q)	HP:0000995, HP:0004334, HP:0025164, HP:0002650, HP:0100559, HP:0001999
80M	UBA1	c.1631G>A (p.R544Q)	HP:0002870,HP:0002650,HP:0001999,HP:0001627,HP:0001263,HP:0000365
42M	WT1	c.865_867delinsAA (p.Y289fs)	HP:0002667, HP:0000964, HP:0012210
65F	ZC4H2	c.199C>T (p.R67*)	HP:0003121,HP:0002827,HP:0002015,HP:0001631,HP:0001508,HP:0001270,HP:0000365,HP:0000175
54F	ZMPSTE24	c.1077dupT (p.L362fs)	HP:0200055,HP:0040024,HP:0030084,HP:0011328,HP:0010648,HP:0010557,HP:0008388,HP:0008090,HP:0004322,HP:0004209,HP:0002119,HP:0001999,HP:0001238,HP:0000581,HP:0000256
		Highlighted mutations are classifed as pathogenic or likely pathogenic.
